# Supplementary material for: Interplay between Hormones and Several Abiotic Stress Conditions on Arabidopsis thaliana Primary Root Development
Source: MDPI journal article supplement (doi:10.3390/cells9122576), 2020-12-01
Supplement: s1 [file s1]

| HORMONE   | SYNTHESIS |                                             | SIGNALING               |                                                       | TRANSPORT                              |                                | CATABOLISM |  | REFERENCE           |
|-----------|-----------|---------------------------------------------|-------------------------|-------------------------------------------------------|----------------------------------------|--------------------------------|------------|--|---------------------|
| AUXIN     | TAA1      | TRYPTOPHAN AMINOTRANSFERASE OF ARABIDOPSIS1 | TIR1                    | TRANSPORT INHIBITOR RESPONSE 1                        | PIN                                    | PIN-FORMED                     |            |  | [13,30,256,266–270] |
|           | YUC       | YUCCA                                       | AFB                     | AUXIN SIGNALING F-BOX PROTEIN                         | AUX1/LAXS                              | AUXIN TRANSPORTER 1 /LIKE-AUXS |            |  |                     |
|           | ASA1      | ANTHRANILATE SYNTHASE alpha SUBUNIT 1       | AUX/IAA                 | AUXIN/INDOLE ACETIC ACID                              | PILS                                   | PIN-LIKES                      |            |  |                     |
|           |           |                                             | ARFs                    | AUXIN RESPONSE                                        |                                        |                                |            |  |                     |
|           |           |                                             | IAR                     | INDOLE-3-ACETIC ACID (IAA)-ALA HYDROLASE              |                                        |                                |            |  |                     |
|           | CK        | IPT                                         | ISOPENTENYL TRANSFERASE | AHK                                                   | ARABIDOPSIS HISTIDINE-KINASE RECEPTORS | CONJUGATION                    |            |  |                     |
| CRE1/AHK4 |           |                                             |                         | CYTOKININ RESPONSE 1                                  | UGT76C2 CYTOKININ GLYCOSYLTRANSFERASE  |                                |            |  |                     |
| B-ARR     |           |                                             |                         | TYPE-B ARABIDOPSIS RESPONSE REGULATORS                |                                        |                                |            |  |                     |
| A-ARR     |           |                                             |                         | TYPE-A-ARABIDOPSIS RESPONSE REGULATORS                |                                        |                                |            |  |                     |
| GA        | GA1/CPS   | ENT-COPALYL DIPHOSPHATE SYNTHASE            | SLY                     | SLEEPY                                                |                                        |                                |            |  | [276–278]           |
|           |           |                                             | DELLAs                  | GA INSENSITIVE (GAI)                                  |                                        |                                |            |  |                     |
|           |           |                                             |                         | REPRESSOR OF GAI (RGA)                                |                                        |                                |            |  |                     |
|           |           |                                             |                         | RGA-LIKE (RGL)                                        |                                        |                                |            |  |                     |
| BR        | DET2      | DEETIOLATED2                                | BRI1                    | BRASSINOSTEROID INSENSITIVE1                          |                                        |                                |            |  | [279–283]           |
|           |           |                                             | BRL1/3                  | BRASSINOSTEROID INSENSITIVE1-LIKE RECEPTOR KINASE 1/3 |                                        |                                |            |  |                     |
|           |           |                                             | BSK                     | BRASSINOSTEROID-SIGNALING KINASE                      |                                        |                                |            |  |                     |
|           |           |                                             | BES1                    | BRI1-EMS-SUPPRESSOR1                                  |                                        |                                |            |  |                     |
|           |           |                                             | BKI 1                   | BRASSINOSTEROID KINASE INHIBITOR 1                    |                                        |                                |            |  |                     |
|           |           |                                             | BZR1/2                  | BRASSINAZOLE RESISTANT 1/2                            |                                        |                                |            |  |                     |
|           |           |                                             | BIN2                    | BRASSINOSTEROID INSENSITIVE 2                         |                                        |                                |            |  |                     |
|           |           |                                             | BIL1/2                  | BIN2 like1/2                                          |                                        |                                |            |  |                     |
| ABA       | ABA1 /ZEP | ZEAXANTHIN EPOXIDASE                        | ABI1                    | ABA INSENSITIVE 1                                     |                                        |                                |            |  | [284–287]           |
|           | ABA2 /SDR | SHORT-CHAIN DEHYDROGENASE/REDUCTASE         |                         |                                                       |                                        |                                |            |  |                     |

**Table S1. Proteins encoded by genes whose loss or gain of function were used in this review (continuation)**

| HORMONE  | SYNTHESIS  |                                                                   | SIGNALING   |                                              | REFERENCE    |
|----------|------------|-------------------------------------------------------------------|-------------|----------------------------------------------|--------------|
| ABA      | ABA3/MCS   | MOLYBDENUM COFACTOR SULFURASE                                     | HAB1        | HYPERSENSITIVE TO ABA1                       |              |
|          |            |                                                                   | HAI1/3      | HIGHLY ABA-INDUCED1/3                        |              |
|          |            |                                                                   | AIP1 (HAI2) | AKT1-INTERACTING PHOSPHATASE1                |              |
|          |            |                                                                   | PERK4       | PROLINE-RICH EXTENSIN-LIKE RECEPTOR KINASE 4 |              |
| ETHYLENE | ETO1/HSP3  | ETHYLENE OVERPRODUCER 1/ HYPERSENSITIVE TO PHOSPHATE STARVATION 3 | ETR1/2      | ETHYLENE RESPONSE 1/2                        | [288–291]    |
|          | ETO2/ACS   | 1-AMINOCYCLOPROPANE-1-CARBOXYLATE (ACC) SYNTHASE                  | EIN4        | ETHYLENE INSENSITIVE 4                       |              |
|          |            |                                                                   | EBF1        | EIN3-BINDING F BOX PROTEIN 1                 |              |
|          |            |                                                                   | EIN2/5/6    | ETHYLENE INSENSITIVE2/5/6                    |              |
|          |            |                                                                   | CTR1        | CONSTITUTIVE RESPONSE 1                      |              |
|          |            |                                                                   | EIN3/EIL 1  | ETHYLENE INSENSITIVE3/EIN3-LIKE              |              |
|          |            |                                                                   | ERF1        | ETHYLENE RESPONSE FACTOR1                    |              |
| JA       | AOS        | ALLENE OXIDE SYNTHASE                                             | COI1/2      | CORONATINE INSENSITIVE 1/2                   | [292–296]    |
|          | OPR3       | 12-OXOPHYTODIENOATE REDUCTASE 3                                   | JAZ         | JASMONATE ZIM DOMAIN PROTEINS                |              |
|          |            |                                                                   | NINJA       | NOVEL INTERACTOR OF JAZ                      |              |
|          |            |                                                                   | MYC2/3/4    | Helix- loop-helix (bHLH) proteins            |              |
| SA       | SID2       | SALICYLIC ACID INDUCTION DEFICIENT 2 (ISOCHORISMATE SYNTHASE)     | NPR1/3/4    | NONEXPRESSOR OF PR GENES 1/3/4               | [24,297,298] |
| SL       | MAX1       | CYTOCHROME P450 MONOOXYGENASE                                     | MAX2        | MORE AXILLARY GROWTH 1                       | [299,300]    |
|          | MAX3/CCD 7 | CAROTENOID CLEAVAGE DIOXYGENASE 7                                 |             |                                              |              |
|          | MAX3/CCD 8 | CAROTENOID CLEAVAGE DIOXYGENASE 8                                 |             |                                              |              |

**Table S2. Primary root (PR) phenotype of loss or gain of function mutants of genes that participate in hormone homeostasis compared to WT under different abiotic stresses**

| Hormone | Mutant name                    | Mutant     | Type of abiotic stress |           |                 |      |           |                                                           |                                         |                  |               | Reference         |
|---------|--------------------------------|------------|------------------------|-----------|-----------------|------|-----------|-----------------------------------------------------------|-----------------------------------------|------------------|---------------|-------------------|
|         |                                |            | Osmotic                | Salinity  | ABA application | Cold | Oxidative | Heavy metal                                               | Nutrient deficiency                     | High temperature | Alkalinity    |                   |
| AUXIN   | <i>yucID</i>                   | <i>GoF</i> |                        |           |                 |      |           | Strong inhibition in response to Al stress                |                                         |                  |               | [175]             |
|         | <i>YUC1</i>                    | <i>OE</i>  |                        |           |                 |      |           |                                                           | Short PR in response to low Pi          |                  |               | [221]             |
|         | <i>YUC4</i>                    | <i>OE</i>  |                        |           | Short           |      |           |                                                           |                                         |                  |               | [144]             |
|         | <i>yuc9</i>                    | <i>LoF</i> |                        |           |                 |      |           | Long PR under Al stress.                                  |                                         |                  |               | [178]             |
|         | <i>yuc8 yuc9</i>               | <i>LoF</i> |                        |           |                 |      |           | Long PR under Al stress                                   |                                         |                  |               | [93,178]          |
|         | <i>wei2 (asa1)</i>             | <i>LoF</i> |                        |           |                 |      |           |                                                           |                                         |                  | Less affected | [265]             |
|         | <i>taal1-1 (ckrc1-1, wei8)</i> | <i>LoF</i> |                        |           |                 |      |           | Long PR under Al stress                                   |                                         | Short            | Less affected | [175,176,260,265] |
|         | <i>tir1-1</i>                  | <i>LoF</i> |                        |           | Long            |      |           | Long under Cd treatment                                   |                                         |                  |               | [67,75,142,182]   |
|         | <i>TIR1</i>                    | <i>OE</i>  |                        |           |                 |      |           |                                                           | Short PR under high P                   |                  |               | [222]             |
|         | <i>tir1 afb2</i>               | <i>LoF</i> |                        | Long      |                 |      | Long      |                                                           |                                         |                  |               | [124]             |
|         | <i>tir1-1 afb2-3</i>           | <i>LoF</i> |                        |           |                 |      |           |                                                           |                                         | Short            |               | [258]             |
|         | <i>tir1 afb3</i>               | <i>LoF</i> |                        |           |                 |      | Long      |                                                           |                                         |                  |               | [124]             |
|         | <i>afb3-1</i>                  | <i>LoF</i> |                        |           |                 |      |           |                                                           | Not inhibited by NO3                    |                  |               | [208]             |
|         | <i>tir1 afb2 afb3</i>          | <i>LoF</i> |                        |           |                 |      |           |                                                           | Short PR under high Pi                  |                  |               | [222]             |
|         | <i>iaa5-1</i>                  | <i>LoF</i> | Short                  |           |                 |      |           |                                                           |                                         |                  |               | [120]             |
|         | <i>iaa7 (axr2-1)</i>           | <i>GoF</i> |                        |           | Long            |      |           |                                                           | Long PR under high Pi                   |                  |               | [67,75,142,217]   |
|         | <i>iaa6-1</i>                  | <i>LoF</i> | Short                  |           |                 |      |           |                                                           |                                         |                  |               | [120]             |
|         | <i>iaa14 (slr-1)</i>           | <i>GoF</i> |                        |           |                 |      |           | Long PR under Al stress. Long PR under Cr(VI) stress      |                                         |                  |               | [175,176,198]     |
|         | <i>iaa17 (axr3)</i>            | <i>GoF</i> |                        | Inhibited |                 |      |           | Long PR under Cd or Cr(VI) stress. More sensitive to La3+ |                                         |                  |               | [93,182,194]      |
|         | <i>iaa19-1</i>                 | <i>LoF</i> | Short                  |           |                 |      |           |                                                           |                                         |                  |               | [120]             |
|         | <i>iaa28-1</i>                 | <i>GoF</i> |                        |           |                 |      |           |                                                           | Short PR under low or high Pi treatment |                  |               | [217]             |
|         | <i>arf1</i>                    | <i>LoF</i> |                        |           |                 |      |           | Long PR under Al stress.                                  |                                         |                  |               | [175]             |

**Table S2. Primary root (PR) phenotype of loss or gain of function mutants of genes that participate in hormone homeostasis compared to WT under different abiotic stresses (continuation)**

| Hormone | Mutant name              | Mutant     | Type of abiotic stress |                       |                                           |      |           |                                                                             |                                                                                                      |                  |               | References                                         |
|---------|--------------------------|------------|------------------------|-----------------------|-------------------------------------------|------|-----------|-----------------------------------------------------------------------------|------------------------------------------------------------------------------------------------------|------------------|---------------|----------------------------------------------------|
|         |                          |            | Osmotic                | Salinity              | ABA application                           | Cold | Oxidative | Heavy metal                                                                 | Nutrient deficiency                                                                                  | High temperature | Alkalinity    |                                                    |
| AUXIN   | <i>arf2-101</i>          | <i>LoF</i> |                        |                       | Hypersensitive to ABA, short PR           |      |           |                                                                             |                                                                                                      |                  |               | [143]                                              |
|         | <i>ARF2</i>              | <i>OE</i>  |                        |                       | Long                                      |      |           |                                                                             |                                                                                                      |                  |               | [143]                                              |
|         | <i>arf6</i>              | <i>LoF</i> |                        |                       |                                           |      |           | Long PR under Al stress.                                                    |                                                                                                      |                  |               | [175]                                              |
|         | <i>arf8</i>              | <i>LoF</i> |                        |                       |                                           |      |           |                                                                             |                                                                                                      |                  |               |                                                    |
|         | <i>arf9</i>              | <i>LoF</i> |                        |                       |                                           |      |           |                                                                             |                                                                                                      |                  |               |                                                    |
|         | <i>arf10</i>             | <i>LoF</i> |                        |                       |                                           |      |           |                                                                             |                                                                                                      |                  |               |                                                    |
|         | <i>arf16</i>             | <i>LoF</i> |                        |                       |                                           |      |           |                                                                             |                                                                                                      |                  |               |                                                    |
|         | <i>arf7 arf19</i>        | <i>LoF</i> |                        |                       |                                           |      |           |                                                                             |                                                                                                      |                  |               |                                                    |
|         | <i>arf10 arf16</i>       | <i>LoF</i> |                        |                       |                                           |      |           |                                                                             |                                                                                                      |                  |               |                                                    |
|         | <i>pin1</i>              | <i>LoF</i> |                        |                       |                                           |      |           | More inhibition by As(III). Long PR under Cu excess. Less sensitive to La3+ |                                                                                                      |                  |               | [123,194,199]                                      |
|         | <i>pin2 (eir1-1)</i>     | <i>LoF</i> |                        | Short                 | Less sensitive to low ABA concentrations  |      |           | More inhibition by As(III). Long PR under Al or Cd stress.                  | Long PR under ammonium or high Pi conditions. Short PR under low-B. Decreased growth under Fe stress | Short            | Short         | [66,67,75,121,142,174,175,182,194,217,264,265]     |
|         | <i>pin2 (eir1-4)</i>     | <i>LoF</i> |                        |                       |                                           |      |           | More inhibition by As(III)                                                  |                                                                                                      |                  |               | [174]                                              |
|         | <i>PIN2</i>              | <i>OE</i>  |                        |                       |                                           |      |           | Improved tolerance to As(III).                                              |                                                                                                      |                  |               | [174]                                              |
|         | <i>pin4-3</i>            | <i>LoF</i> |                        |                       |                                           |      |           | Less sensitive to La3+                                                      |                                                                                                      |                  |               | [194]                                              |
|         | <i>pin1 pin3 pin7</i>    | <i>LoF</i> |                        |                       |                                           |      |           | Long PR under Cd stress                                                     |                                                                                                      |                  |               | [182]                                              |
|         | <i>pil6</i>              | <i>LoF</i> |                        |                       |                                           |      |           |                                                                             |                                                                                                      | Short            |               | [257]                                              |
|         | <i>PIL6</i>              | <i>OE</i>  |                        |                       |                                           |      |           |                                                                             |                                                                                                      | Long             |               | [257]                                              |
|         | <i>PIN8</i>              | <i>OE</i>  |                        |                       |                                           |      |           | Strong inhibition in response to Al stress                                  |                                                                                                      |                  |               | [175]                                              |
|         | <i>aux1-7</i>            | <i>LoF</i> | Short                  | Short                 | Long                                      |      |           | More inhibition by As(III). Long PR under Al or Cr(VI) stress.              | Long PR under ammonium or high Pi conditions. Decreased growth under Fe stress                       | Short            | Less affected | [67,75,75,115,121,123,142,175,177,194,217,257,265] |
|         | <i>aux1-T</i>            | <i>LoF</i> |                        |                       | Less sensitive to low and high ABA levels |      |           |                                                                             |                                                                                                      |                  |               | [66]                                               |
|         | <i>aux1-22</i>           | <i>LoF</i> |                        |                       |                                           |      |           |                                                                             | Long PR under low B                                                                                  |                  |               | [244]                                              |
|         | <i>iar3</i>              | <i>LoF</i> | Long                   |                       |                                           |      |           |                                                                             |                                                                                                      |                  |               | [125]                                              |
|         | <i>iar4-7 and iar4-8</i> | <i>LoF</i> |                        | More affected by salt |                                           |      |           |                                                                             |                                                                                                      |                  |               | [301]                                              |

**Table S2. Primary root (PR) phenotype of loss or gain of function mutants of genes that participate in hormone homeostasis compared to WT under different abiotic stresses (continuation)**

| Hormone | Mutant name                | Mutant     | Type of abiotic stress                                               |                                          |                 |      |           |                         |                                                                                                       |                  |            | References                 |
|---------|----------------------------|------------|----------------------------------------------------------------------|------------------------------------------|-----------------|------|-----------|-------------------------|-------------------------------------------------------------------------------------------------------|------------------|------------|----------------------------|
|         |                            |            | Osmotic                                                              | Salinity                                 | ABA application | Cold | Oxidative | Heavy metal             | Nutrient deficiency                                                                                   | High temperature | Alkalinity |                            |
| CK      | <i>ipt3</i>                | <i>LoF</i> |                                                                      |                                          |                 |      |           |                         | Short PR under NO3 supply                                                                             |                  |            | [205]                      |
|         | <i>ipt5</i>                | <i>LoF</i> |                                                                      |                                          |                 |      |           |                         |                                                                                                       |                  |            |                            |
|         | <i>IPT3</i>                | OE         |                                                                      |                                          |                 |      |           |                         | Reduced growth under K-deficient and K-sufficient conditions                                          |                  |            | [238]                      |
|         | <i>ipt3 ipt7</i>           | <i>LoF</i> |                                                                      |                                          |                 |      |           | Long PR under Al stress |                                                                                                       |                  |            | [176]                      |
|         | <i>ipt5 ipt7</i>           | <i>LoF</i> |                                                                      |                                          |                 |      |           |                         |                                                                                                       |                  |            | [176]                      |
|         | <i>ipt1 ipt3 ipt5 ipt7</i> | <i>LoF</i> |                                                                      | More growth                              |                 |      |           |                         | Insensitive to K deficiency                                                                           |                  |            | [176,238]                  |
|         | <i>IPT8</i>                | OE         |                                                                      | Inhibited growth                         |                 |      |           |                         |                                                                                                       |                  |            | [130]                      |
|         | <i>cre1 ahk2</i>           | <i>LoF</i> |                                                                      |                                          |                 |      |           | Long PR under Al stress |                                                                                                       |                  |            | [176]                      |
|         | <i>ahk2</i>                | <i>LoF</i> | Short PR under normal water potential (-0.25 MPa)                    | More inhibition under 75 or 150 mM salt  |                 |      |           | Long PR under Al stress | Not affected by K-starved conditions                                                                  |                  |            | [112,176,238]              |
|         | <i>ahk3</i>                | <i>LoF</i> | Long PR under low (-1.2 MPa) and moderate water (-0.7 MPa) potential | More inhibition under 150 mM salt        |                 |      |           |                         | Not affected by K-starved conditions                                                                  |                  |            | [112,238]                  |
|         | <i>ahk4 (cre1-12)</i>      | <i>LoF</i> | Long PR under normal water potential                                 |                                          |                 |      |           | Long PR under Al stress | Less sensitive to CK under P availability. Less affected by K-starved conditions                      |                  |            | [112,176,224]              |
|         | <i>ahk2 ahk3</i>           | <i>LoF</i> | Long PR under moderate water potential                               | More inhibition under 75 and 150 mM salt | Short           |      |           |                         | Short PR under NO3 constant supply. Not affected by K-starved conditions. Short PR under B deficiency |                  |            | [112,148,149, 205,238,247] |
|         | <i>ahk2 ahk4</i>           | <i>LoF</i> | More inhibition under low and moderate water potential               | More inhibition under 75 mM salt stress  |                 |      |           |                         | Short PR under NO3 constant supply. Less affected by K-starved conditions                             |                  |            | [112,205]                  |

**Table S2. Primary root (PR) phenotype of loss or gain of function mutants of genes that participate in hormone homeostasis compared to WT under different abiotic stresses (continuation)**

| Hormone | Mutant name                        | Mutant     | Type of abiotic stress                    |          |                 |      |                      |                          |                                                                          |                  |            | References    |
|---------|------------------------------------|------------|-------------------------------------------|----------|-----------------|------|----------------------|--------------------------|--------------------------------------------------------------------------|------------------|------------|---------------|
|         |                                    |            | Osmotic                                   | Salinity | ABA application | Cold | Oxidative            | Heavy metal              | Nutrient deficiency                                                      | High temperature | Alkalinity |               |
| CK      | <i>ahk3 ahk4</i>                   | <i>LoF</i> | More inhibition under low water potential |          |                 |      |                      |                          | Short PR under NO3 constant supply. Not affected by K-starved conditions |                  |            | [112,205,238] |
|         | <i>arr1 arr11</i>                  | <i>LoF</i> |                                           |          | Short           |      |                      |                          |                                                                          |                  |            | [148,149]     |
|         | <i>arr1 arr12</i>                  | <i>LoF</i> |                                           |          | Short           |      |                      |                          | Short PR under B deficiency                                              |                  |            | [148,149,247] |
|         | <i>arr1 arr10 arr12</i>            | <i>LoF</i> |                                           |          |                 |      |                      | Long PR under Al stress  | Short PR under B deficiency                                              |                  |            | [176,247]     |
|         | <i>arr1 arr11 arr12</i>            | <i>LoF</i> |                                           |          | Short           |      |                      |                          |                                                                          |                  |            | [148]         |
|         | <i>ARR1</i>                        | <i>OE</i>  |                                           |          |                 |      |                      | Short PR under Al stress |                                                                          |                  |            | [176]         |
|         | <i>ARR12</i>                       | <i>OE</i>  |                                           |          |                 |      |                      | Short PR under Al stress |                                                                          |                  |            | [176]         |
|         | <i>ARR5</i>                        | <i>OE</i>  |                                           |          | Short           |      |                      |                          |                                                                          |                  |            | [148]         |
|         | <i>ckx3-1</i>                      | <i>LoF</i> |                                           |          |                 |      |                      | Short PR under Al stress |                                                                          |                  |            | [176]         |
|         | <i>CKX</i>                         | <i>OE</i>  | Long                                      |          |                 |      |                      |                          |                                                                          |                  |            | [126,127,129] |
|         | <i>ugt76c2</i>                     | <i>LoF</i> |                                           |          | Long            |      |                      |                          |                                                                          |                  |            | [147]         |
|         | <i>UGT76C2</i>                     | <i>OE</i>  |                                           |          | Short           |      |                      |                          |                                                                          |                  |            | [147]         |
| GA      | <i>gal-3</i>                       | <i>LoF</i> |                                           |          |                 |      | Less affected by DPI |                          |                                                                          |                  |            | [165]         |
|         | <i>gai</i>                         | <i>GoF</i> |                                           |          |                 |      |                      |                          | Short PR under low Pi                                                    |                  |            | [226]         |
|         | <i>gal-t</i>                       | <i>LoF</i> |                                           |          |                 |      |                      |                          | Short PR under low Pi;                                                   |                  |            | [226]         |
|         | <i>gai-t6 rga-24</i>               | <i>LoF</i> |                                           |          |                 | Long |                      |                          |                                                                          |                  |            | [132]         |
|         | <i>sly1-10</i>                     | <i>LoF</i> |                                           |          |                 |      |                      |                          | Short PR under low Pi                                                    |                  |            | [226]         |
|         | <i>gai-t6 rga-t2 rgl1-1 rgl2-1</i> | <i>LoF</i> |                                           | Long     | Less affected   | Long |                      |                          | Long PR under low Pi                                                     |                  |            | [117,132,226] |



**Table S2. Primary root (PR) phenotype of loss or gain of function mutants of genes that participate in hormone homeostasis compared to WT under different abiotic stresses (continuation)**

| Hormone  | Mutant name                                             | Mutant     | Type of abiotic stress |          |                                        |      |                            |                                                         |                                                           |                  |                | References                              |
|----------|---------------------------------------------------------|------------|------------------------|----------|----------------------------------------|------|----------------------------|---------------------------------------------------------|-----------------------------------------------------------|------------------|----------------|-----------------------------------------|
|          |                                                         |            | Osmotic                | Salinity | ABA application                        | Cold | Oxidative                  | Heavy metal                                             | Nutrient deficiency                                       | High temperature | Alkalinity     |                                         |
| ABA      | <i>hab1-1 abi1-2</i>                                    | <i>LoF</i> |                        |          |                                        |      |                            | Short PR in the co-treatment of Cu with ABA             |                                                           |                  |                | [201]                                   |
|          | <i>abi1 abi3 hab1</i>                                   | <i>LoF</i> |                        |          | Long                                   |      |                            |                                                         |                                                           |                  |                | [146]                                   |
| Ethylene | <i>acs1-1 acs2-1 acs4-1 acs5-2 acs6-1 acs7-1</i>        | <i>LoF</i> |                        |          | Long                                   |      |                            |                                                         |                                                           |                  |                | [146]                                   |
|          | <i>acs2-1 acs4-1 acs5-2 acs6-1 acs7-1 acs9-1</i>        | <i>LoF</i> |                        |          | Long                                   |      |                            |                                                         |                                                           |                  |                | [146]                                   |
|          | <i>acs1-1 acs2-1 acs4-1 acs5-2 acs6-1 acs7-1 acs9-1</i> | <i>LoF</i> |                        |          | Long                                   |      |                            |                                                         |                                                           |                  |                | [146]                                   |
|          | <i>eto1-1</i>                                           | <i>LoF</i> |                        |          | Short. Long PR under ABA-AVG treatment |      |                            | Short PR under Al or Cr(VI) stress                      | Short PR under low or high P<br>Long PR in response to Fe |                  | Hypersensitive | [75,135,146,195,217,234,235,265]        |
|          | <i>eto1-2</i>                                           | <i>LoF</i> |                        |          |                                        |      |                            | More inhibition under Al and NAA co-treatment           |                                                           |                  |                | [175]                                   |
|          | <i>eto2-1</i>                                           | <i>GoF</i> |                        |          |                                        |      |                            |                                                         | More growth in response to Fe                             |                  |                | [251]                                   |
|          | <i>hsp3-1</i>                                           | <i>LoF</i> |                        |          |                                        |      |                            |                                                         | Short PR under under high or low Pi.                      |                  |                | [235]                                   |
|          | <i>hsp3-2</i>                                           | <i>LoF</i> |                        |          |                                        |      |                            |                                                         | Short PR under under high or low Pi                       |                  |                | [235]                                   |
|          | <i>ein2-1</i>                                           | <i>LoF</i> |                        |          | Long                                   |      |                            | Long PR under Al or Cr(VI) stress. More sensitive to Pb | Not growth repression under low K                         | Short            | Long           | [67,75,135,176,179,195,202,243,262,265] |
|          | <i>ein2-5</i>                                           | <i>LoF</i> | Short                  | Short    | Long PR under ABA-AVG treatment        |      | Long PR under MV treatment |                                                         |                                                           |                  |                | [135,146,146,166,177]                   |
|          | <i>ein3-1</i>                                           | <i>LoF</i> |                        |          |                                        |      |                            |                                                         |                                                           |                  | Long           | [265]                                   |
|          | <i>ein4-1</i>                                           | <i>LoF</i> |                        |          |                                        |      |                            | Long PR under Cd treatment                              |                                                           |                  |                | [187]                                   |
|          | <i>ein3-1 eil1-1</i>                                    | <i>LoF</i> |                        |          |                                        |      | Long PR under MV treatment | Long PR under Al or Cd stress                           |                                                           |                  |                | [166,176,177,179,187,188]               |
|          | <i>EIL1</i>                                             | <i>OE</i>  |                        |          |                                        |      |                            | More growth inhibition under Cd stress                  |                                                           |                  |                | [187]                                   |
|          | <i>EIN3</i>                                             | <i>OE</i>  |                        |          |                                        |      |                            | More growth inhibition under Cd stress                  |                                                           |                  |                | [187]                                   |
|          | <i>etr1-1</i>                                           | <i>LoF</i> |                        |          | Long PR under ABA-AVG treatment        |      |                            |                                                         | Not growth repression under low K                         |                  |                | [146,243]                               |
|          | <i>etr1-3</i>                                           | <i>LoF</i> |                        |          |                                        |      |                            | Long PR under Al or Cr(VI) stress                       | Reduced growth in response to Fe                          |                  | Long           | [177,195,251,265]                       |



**Table S2. Primary root (PR) phenotype of loss or gain of function mutants of genes that participate in hormone homeostasis compared to WT under different abiotic stresses (continuation)**

| Hormone   | Mutant name             | Mutant     | Type of abiotic stress |          |                 |      |           |                                                   |                                                             |                  | References |                       |
|-----------|-------------------------|------------|------------------------|----------|-----------------|------|-----------|---------------------------------------------------|-------------------------------------------------------------|------------------|------------|-----------------------|
|           |                         |            | Osmotic                | Salinity | ABA application | Cold | Oxidative | Heavy metal                                       | Nutrient deficiency                                         | High temperature |            | Alkalinity            |
| Ethylene  | <i>ERF1</i>             | <i>OE</i>  |                        | Long     |                 |      |           |                                                   |                                                             |                  |            | [136]                 |
|           | <i>ctr1</i>             | <i>LoF</i> |                        |          |                 |      |           | More inhibition under Cd stress                   | Short PR under low or high Pi. Long PR in response to Fe    |                  |            | [187,217,234,243,251] |
|           | <i>ebf1-1</i>           | <i>LoF</i> |                        |          |                 |      |           | More inhibition under Cd stress                   |                                                             |                  |            | [187]                 |
|           | <i>EBF1</i>             | <i>OE</i>  |                        |          |                 |      |           | Long PR under Cd treatment                        |                                                             |                  |            | [187]                 |
| JA        | <i>opr3</i>             | <i>LoF</i> |                        |          |                 |      |           |                                                   | Long PR under P deficiency.                                 |                  |            | [236]                 |
|           | <i>aos</i>              | <i>LoF</i> |                        |          |                 |      |           | Long PR under Al stress. Short under Cd treatment |                                                             |                  |            | [180,189]             |
|           | <i>myc2-2</i>           | <i>LoF</i> |                        |          |                 |      |           | Long PR under Al stress                           |                                                             |                  |            | [180]                 |
|           | <i>myc2/3/4</i>         | <i>LoF</i> |                        | Long     |                 |      |           |                                                   |                                                             |                  |            | [118,137]             |
|           | <i>jai3-1</i>           | <i>LoF</i> |                        | Long     |                 |      |           |                                                   |                                                             |                  |            | [118,137]             |
|           | <i>coi1-2</i>           | <i>LoF</i> |                        | Long     |                 |      |           | Long PR under Al stress                           |                                                             |                  |            | [118,137,180]         |
| SA        | <i>sid2-2</i>           | <i>LoF</i> |                        |          |                 |      |           |                                                   | Less PR growth under the cotreatment: SA and high or low N  |                  |            | [210]                 |
|           | <i>nahG</i>             | <i>OE</i>  |                        |          |                 |      |           | Long PR under Cd stress                           | Less PR growth under the cotreatment: SA and high or low N. | Short            |            | [190,210,262]         |
|           | <i>npr1-1</i>           | <i>LoF</i> |                        |          |                 |      |           | Less inhibition under Al stress                   |                                                             |                  |            | [179]                 |
| SL        | <i>max2-1</i>           | <i>LoF</i> |                        |          |                 |      |           |                                                   | Less reduction of PR length under low Pi.                   |                  |            | [237]                 |
| CROSSTALK | <i>ein2 tir1</i>        | <i>LoF</i> |                        |          | Inhibited       |      |           |                                                   |                                                             |                  |            | [75]                  |
|           | <i>ein2 aux1</i>        | <i>LoF</i> |                        |          | Less inhibition |      |           |                                                   |                                                             |                  |            | [75]                  |
|           | <i>eto1-1 aux1-7</i>    | <i>LoF</i> |                        |          |                 |      |           |                                                   |                                                             |                  | Long       | [265]                 |
|           | <i>ein2-1 npr1-1</i>    | <i>LoF</i> |                        |          |                 |      |           | More Inhibition under Al stress                   |                                                             |                  |            | [179]                 |
|           | <i>arf7arf19 coi1-2</i> | <i>LoF</i> |                        |          |                 |      |           | Long PR under Al stress                           |                                                             |                  |            | [176]                 |
